# Supplementary material
Source: publisher site journal article supplement (https://www.dovepress.com/article/439149)
Supplement: Supplementary file 1 [file get_supplementary_file.php]

## Research Subjects

| NO | M/F | Age        | Cortisol level (ng/mL) | PSQI | Stroke type | NIHSS |
|----|-----|------------|------------------------|------|-------------|-------|
| 1  | M   | 03/11/1965 | 33,5                   |      | 12 CE       | 12    |
| 2  | F   | 10/11/1972 | 12,4                   |      | 10 LAA      | 10    |
| 3  | M   | 11/05/1961 | 6,8                    |      | 8 SVD       | 8     |
| 4  | F   | 07/02/1978 | 12,6                   |      | 7 LAA       | 10    |
| 5  | M   | 02/03/1970 | 5,8                    |      | 9 SVD       | 5     |
| 6  | F   | 15/12/70   | 22,8                   |      | 10 CE       | 8     |
| 7  | M   | 02/02/1964 | 6,4                    |      | 7 LAA       | 8     |
| 8  | M   | 07/10/1957 | 9,8                    |      | 10 LAA      | 17    |
| 9  | F   | 25/10/67   | 24,3                   |      | 15 CE       | 15    |
| 10 | F   | 31/12/52   | 8                      |      | 9 SVD       | 6     |
| 11 | F   | 07/11/1972 | 7,2                    |      | 7 SVD       | 6     |
| 12 | F   | 16/2/72    | 27,7                   |      | 17 CE       | 15    |
| 13 | F   | 19/4/55    | 23,8                   |      | 15 CE       | 15    |
| 14 | F   | 25/3/57    | 5,4                    |      | 7 SVD       | 8     |
| 15 | M   | 13/9/85    | 16,4                   |      | 12 CE       | 12    |
| 16 | F   | 26/7/71    | 14,6                   |      | 14 CE       | 10    |
| 17 | M   | 23/9/54    | 28,9                   |      | 20 LAA      | 17    |
| 18 | M   | 28/12/65   | 6                      |      | 8 SVD       | 8     |
| 19 | M   | 77 th      | 8,6                    |      | 5 SVD       | 8     |
| 20 | M   | 45 th      | 23,2                   |      | 15 LAA      | 18    |
| 21 | M   | 03/05/1953 | 4,4                    |      | 4 SVD       | 4     |
| 22 | M   | 24/4/86    | 9,4                    |      | 9 LAA       | 7     |
| 23 | M   | 24/3/585   | 7,1                    |      | 7 LAA       | 5     |
| 24 | F   | 28/8/61    | 34,6                   |      | 20 CE       | 20    |
| 25 | F   | 03/01/1973 | 6,3                    |      | 10 SVD      | 7     |
| 26 | F   | 55         | 1,7                    |      | 3 LA        | 3     |
| 27 | L   | 60         | 2,7                    |      | 3 LA        | 3     |
| 28 | M   | 26/6/60    | 2,7                    |      | 3 SVD       | 3     |
| 29 | F   | 80         | 8,6                    |      | 10 LAA      | 8     |
| 30 | M   | 80         | 6                      |      | 7 SVD       | 8     |
| 31 | M   | 55         | 7,5                    |      | 9 LAA       | 10    |
| 32 | M   | 66         | 8,7                    |      | 8 LAA       | 10    |
| 33 | M   | 55         | 23,4                   |      | 15 SVD      | 15    |
| 34 | F   | 80         | 5,4                    |      | 7 SVD       | 4     |
| 35 | F   | 46         | 2,8                    |      | 5 SVD       | 4     |
| 36 | M   | 60         | 4,8                    |      | 5 LAA       | 6     |
| 37 | M   | 52         | 7,5                    |      | 6 LAA       | 8     |
| 38 | F   | 45         | 8,7                    |      | 10 CE       | 8     |
| 39 | F   | 52         | 7                      |      | 6 SVD       | 8     |
| 40 | M   | 58         | 8                      |      | 6 SVD       | 8     |
| 41 | F   | 58         | 7,3                    |      | 9 SVD       | 8     |
| 42 | F   | 76         | 9,4                    |      | 10 SVD      | 10    |

|    |   |    |      |        |    |
|----|---|----|------|--------|----|
| 43 | F | 47 | 8,6  | 10 SVD | 10 |
| 44 | M | 72 | 3,8  | 2 SVD  | 10 |
| 45 | M | 63 | 4,9  | 3 LAA  | 3  |
| 46 | F | 53 | 5,7  | 8 LAA  | 7  |
| 47 | F | 40 | 14,6 | 10 LAA | 15 |
| 48 | M | 60 | 22,8 | 15 LAA | 17 |

| <b>Risk factor</b>                         | <b>Location of lesion</b> |
|--------------------------------------------|---------------------------|
| cardiac problem                            | Kortikal                  |
| hypertension                               | Kortikal                  |
| hypertension                               | Basal ganglia             |
| hypertension, diabetes mellitus            | Talamus                   |
| dyslipidemia                               | Basal ganglia             |
| cardiac problem                            | Kortikal                  |
| hypertension, diabetes mellitus, dyslipide | Basal ganglia             |
| hypertension, diabetes mellitus, dyslipide | Pons                      |
| cardiac problem                            | Kortikal                  |
| dyslipidemia                               | Pons                      |
| hypertension, dyslipidemia                 | Medulla Oblongata         |
| cardiac problem                            | Kortikal                  |
| cardiac problem                            | Kortikal                  |
| dyslipidemia                               | Pons                      |
| hypertension, dyslipidemia                 | Basal ganglia             |
| hypertension, diabetes mellitus, dyslipide | Basal ganglia             |
| hypertension, diabetes mellitus, dyslipide | Pons, Basal ganglia       |
| hypertension, dyslipidemia, smoking        | Basal ganglia             |
| Diabetes melitus, smoking                  | Talamus                   |
| hypertension, dyslipidemia, smoking        | Kortikal,Basal ganglia    |
| hypertension                               | pons                      |
| hypertension, dyslipidemia                 | Basal ganglia             |
| hypertension, dyslipidemia                 | pons                      |
| cardiac problem                            | Kortikal                  |
| hypertension                               | Basal ganglia             |
| hypertension                               | Basal ganglia             |
| hypertension, diabetes mellitus            | Basal ganglia             |
| hypertension, diabetes mellitus            | Basal ganglia             |
| hypertension, dyslipidemia                 | Basal ganglia             |
| dyslipidemia                               | Basal ganglia             |
| hypertension, dyslipidemia                 | Pons                      |
| hypertension, dyslipidemia                 | Medulla Oblongata         |
| hypertension, diabetes mellitus, dyslipide | Basal ganglia, kortikal   |
| dyslipidemia                               | Basal ganglia             |
| smoking                                    | Pons                      |
| hypertension                               | Pons                      |
| hypertension, diabetes mellitus            | Basal ganglia             |
| cardiac problem                            | Kortikal                  |
| Diabetes melitus                           | Basal ganglia             |
| hypertension                               | Basal ganglia             |
| dyslipidemia                               | Basal ganglia             |
| hypertension, dyslipidemia                 | Basal ganglia, kortikal   |

|                                            |                         |
|--------------------------------------------|-------------------------|
| hypertension, diabetes mellitus, dyslipide | Basal ganglia, kortikal |
| hypertension                               | Basal ganglia           |
| hypertension, diabetes mellitus            | Pons                    |
| Diabetes melitus                           | Pons                    |
| hypertension, diabetes mellitus            | Talamus                 |
| hypertension, diabetes mellitus, dyslipide | Basal ganglia, talamus  |
